# Supplementary material for: Beyond Pattern Recognition: TLR2 Promotes Chemotaxis, Cell Adhesion, and Migration in THP-1 Cells
Source: MDPI journal article supplement (doi:10.3390/cells12101425), 2023-05-19
Supplement: s1 [file s1]

# LPS

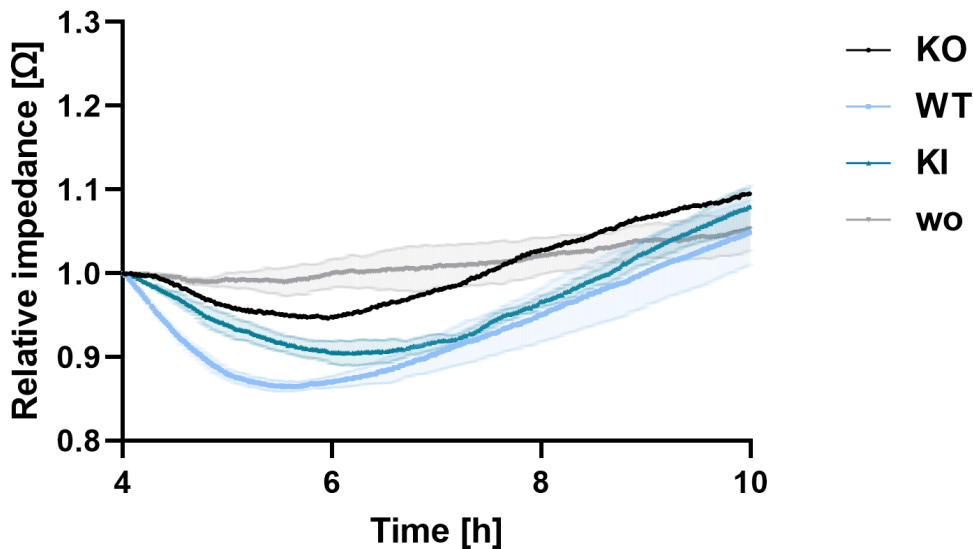

**Figure S2.** Endothelial barrier disruption and transendothelial migration using THP-1 WT, KO, and KI cells stimulated with LPS (100 ng/mL).
