# Supplementary figures and images for: Beyond Pattern Recognition: TLR2 Promotes Chemotaxis, Cell Adhesion, and Migration in THP-1 Cells
Source: MDPI journal article supplement (doi:10.3390/cells12101425), 2023-05-19

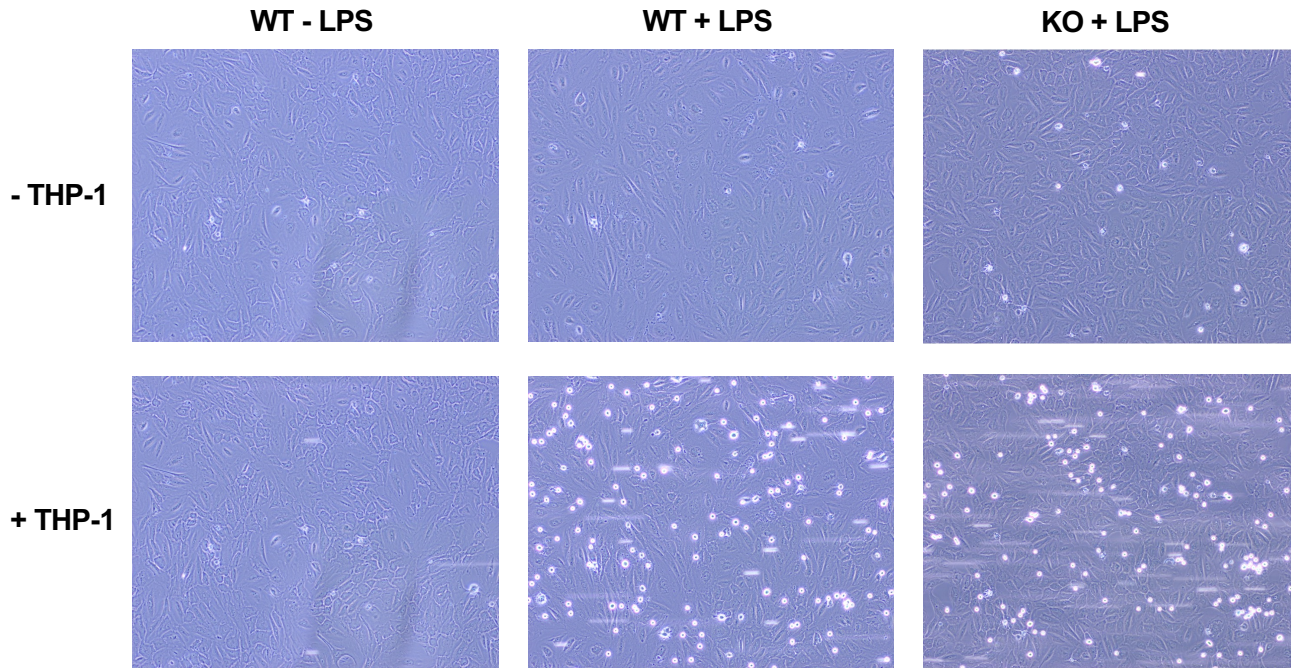

**Figure S1.** Cell layer before and after recirculation of THP-1 WT or KO cells for 15min

Supplement: s1 [file s1]
